# Supplementary material for: DMRT1 regulates human germline commitment
Source: PubMed Central journal article supplement (PMC10567552; doi:10.1038/s41556-023-01224-7), 2023-09-14
Supplement: 41556_2023_1224_MOESM8_ESM.pdf [file 41556_2023_1224_MOESM8_ESM.pdf]

# Source Data for Extended Data Figure 1D: Agarose gel

## DMRT1 locus

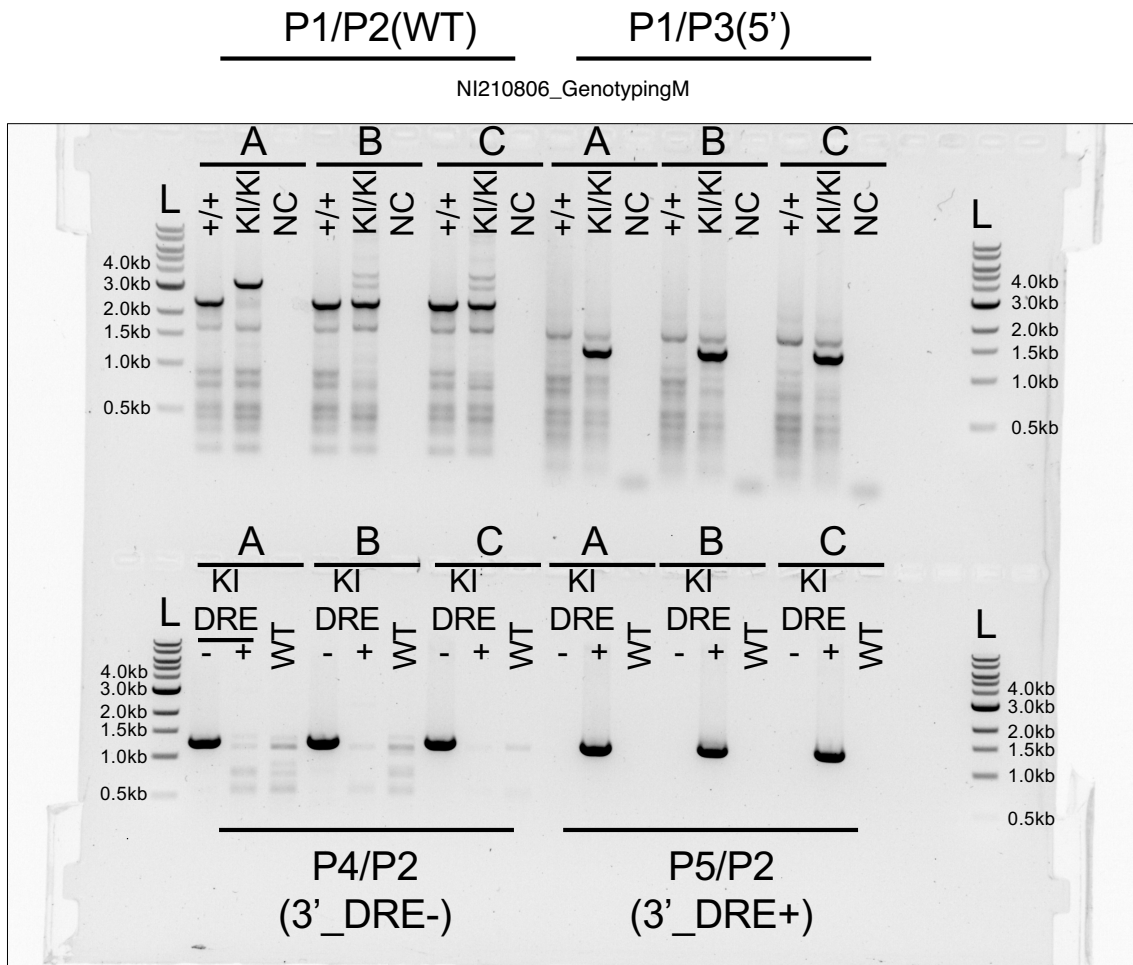

Location: /Users/level2geldoc/Desktop/Naoko  
Printed: 06/08/2021 09:25 am

Page 1 of 1

A: WIS2 NANOS3-tdTomato, DMRT1-mVenus  
B: WIS2 NANOS3-mVenus, DMRT1-tdTomato  
C: Shef-6 DMRT1-tdTomato

L: DNA ladder 1kb

# Source Data for Extended Data Figure 1D: Agarose gel NANOS3 locus

NI210806\_GenotypingN\_W\_5

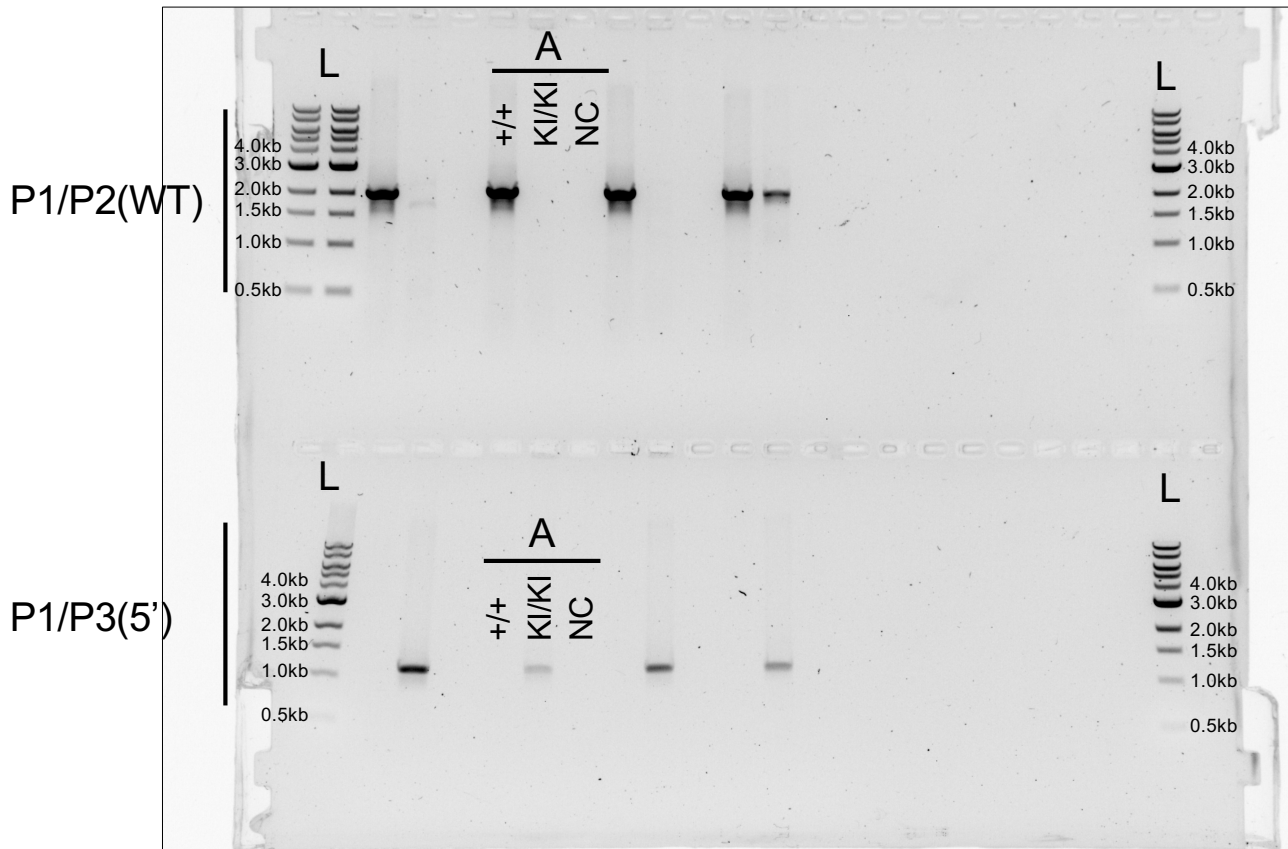

Location: /Users/level2geldoc/Desktop/Naoko  
Printed: 06/08/2021 09:32 am

Page 1 of 1

A: WIS2 NANOS3-mVenus, DMRT1-tdTomato

L: DNA ladder 1kb

# Source Data for Extended Data Figure 1D: Agarose gel NANOS3 locus

NI210808\_GenotypingN\_3ba

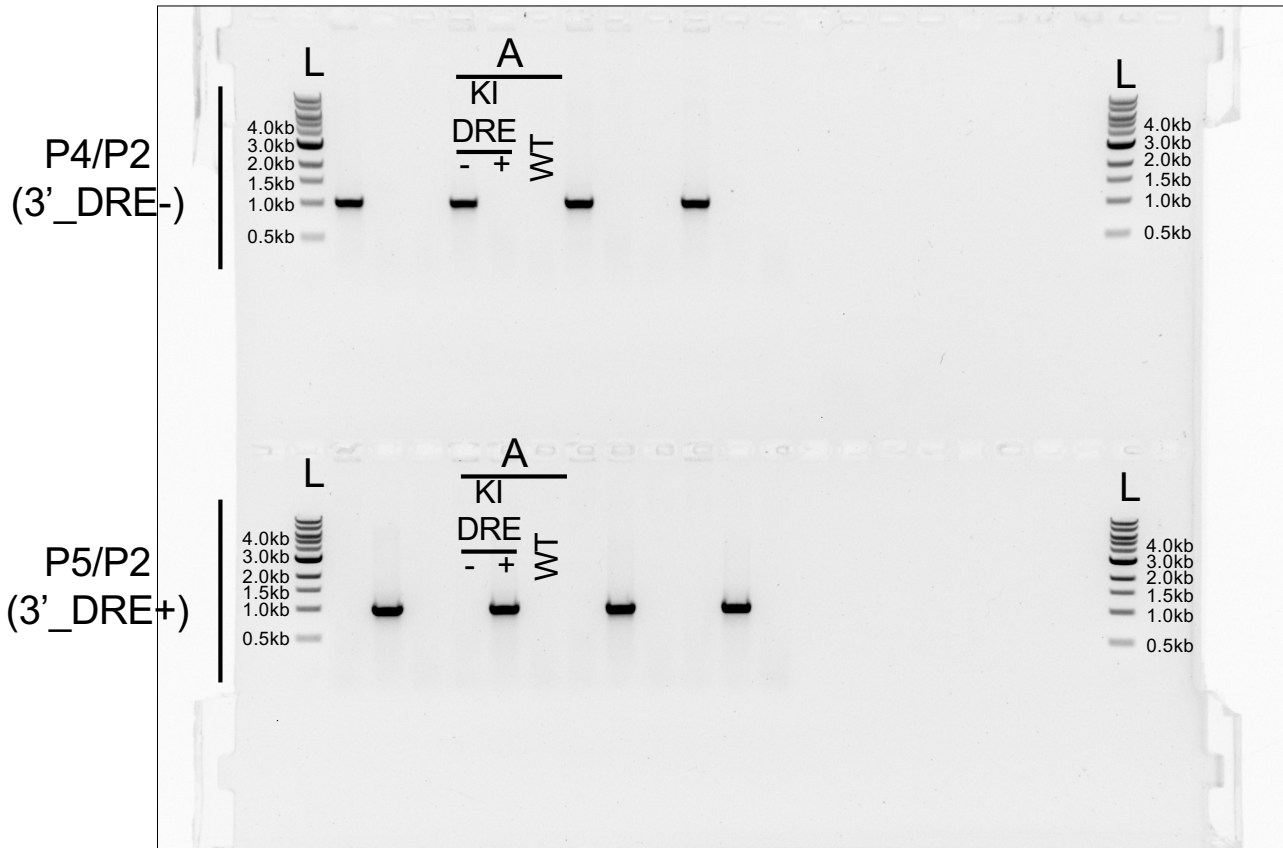

Location: /Users/level2geldoc/Desktop/Naoko  
Printed: 08/08/2021 11:03 am

Page 1 of 1

A: WIS2 NANOS3-mVenus, DMRT1-tdTomato

L: DNA ladder 1kb

# Source Data for Extended Data Figure 1D: Agarose gel

## DAZL locus

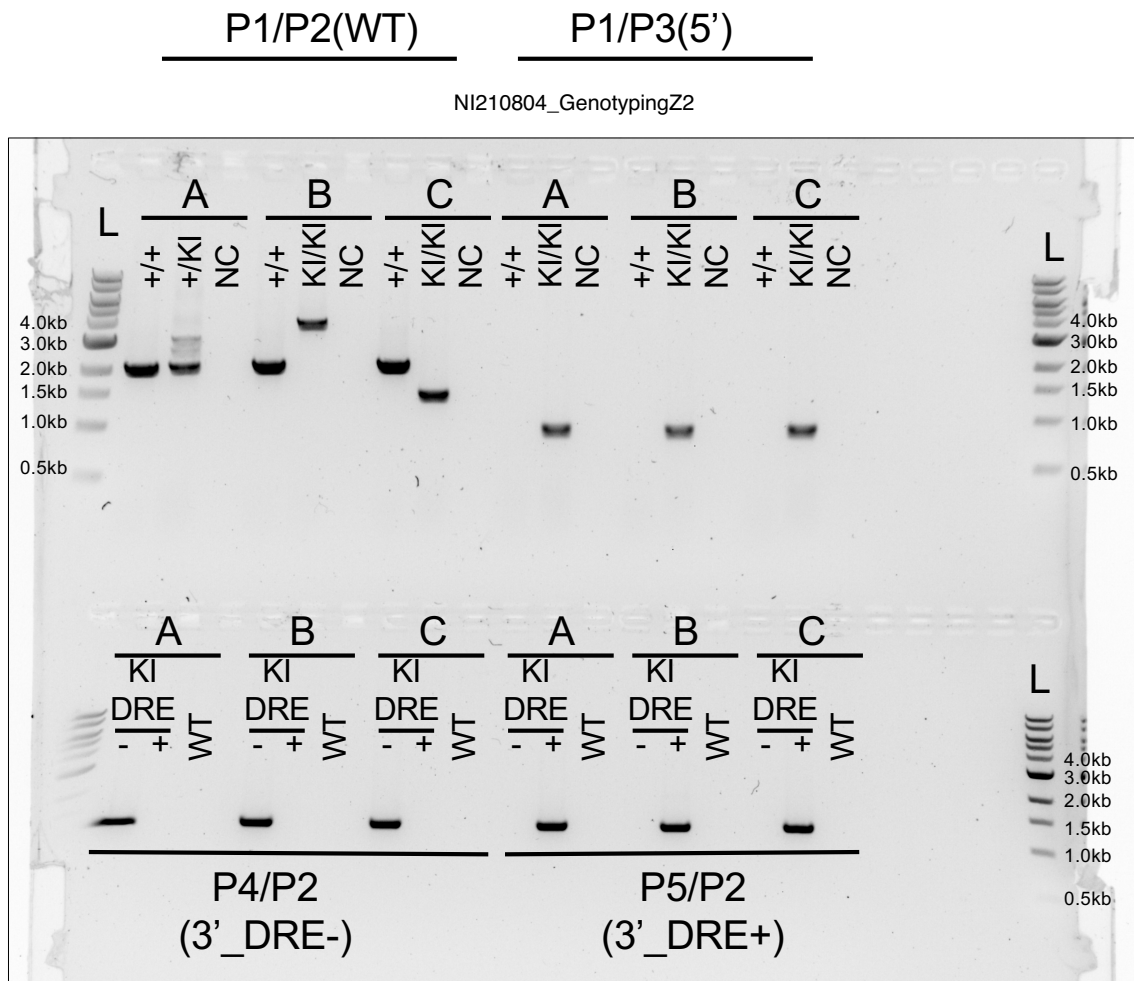

Location: /Users/level2geldoc/Desktop/Naoko  
Printed: 04/08/2021 09:41 am

Page 1 of 1

A: WIS2 DAZL-mVenus  
B: WIS2 DAZL-tdTomato  
C: Shef-6 DAZL-tdTomato

L: DNA ladder 1kb

# Source Data for Extended Data Figure 1G: Western blot

A: day5 PGCLCs  
B: SOX17+PRDM1 clone1  
C: SOX17+PRDM1 clone2

(kDa)  
245  
180  
135  
100  
75(R:Red)  
63  
48  
35  
25(Green)  
20  
17  
11

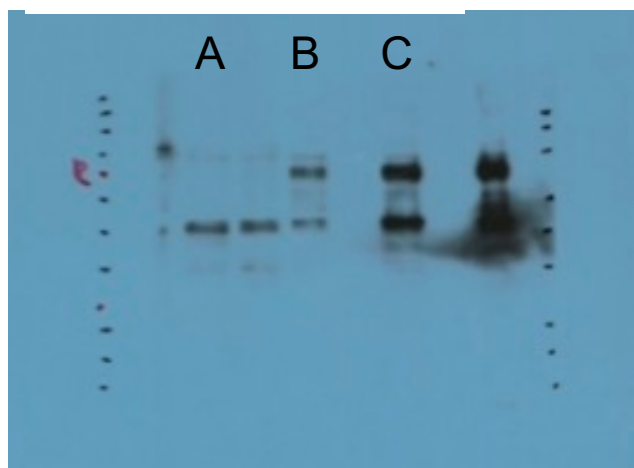

anti-SOX17  
(Exposure:10 min)

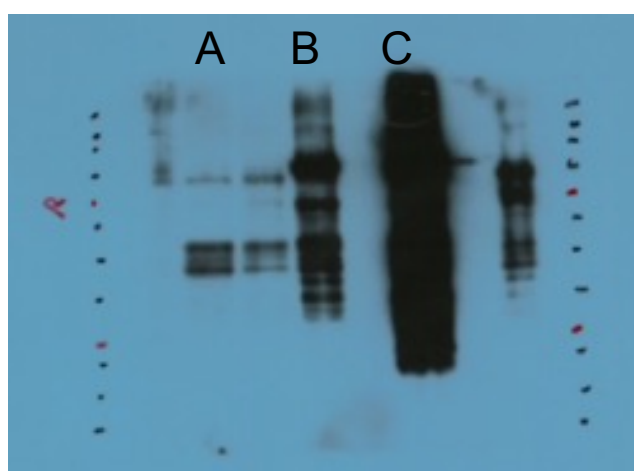

anti-PRDM1  
(Exposure:80 min)

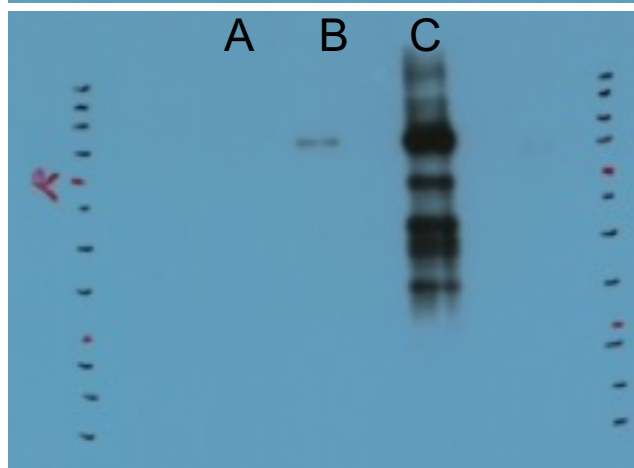

anti-PRDM1  
(Exposure:10 sec)

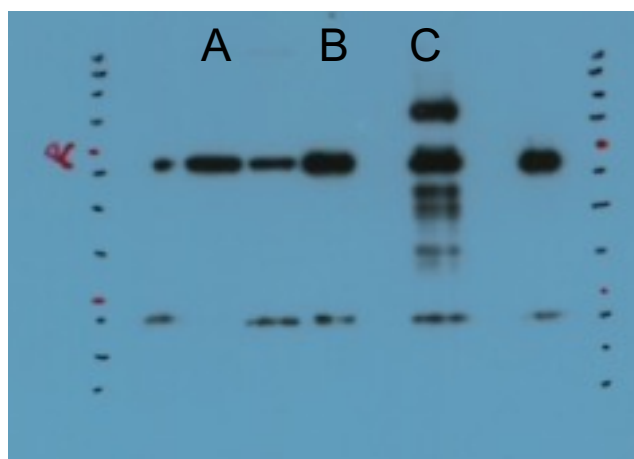

anti-LAMINB1  
(Exposure:1 min)
