# Supplementary material for: DMRT1 regulates human germline commitment
Source: PubMed Central journal article supplement (PMC10567552; doi:10.1038/s41556-023-01224-7), 2023-09-14
Supplement: 41556_2023_1224_MOESM11_ESM.pdf [file 41556_2023_1224_MOESM11_ESM.pdf]

# Source Data for Extended Data Figure 3E: Western blot

A: ESC  
B: day3+6 PGCLC  
C: SOX17+DMRT1 clone1

(kDa)  
245  
180  
135  
100  
75(R:Red)  
63  
48  
35  
25(Green)  
20  
17  
11

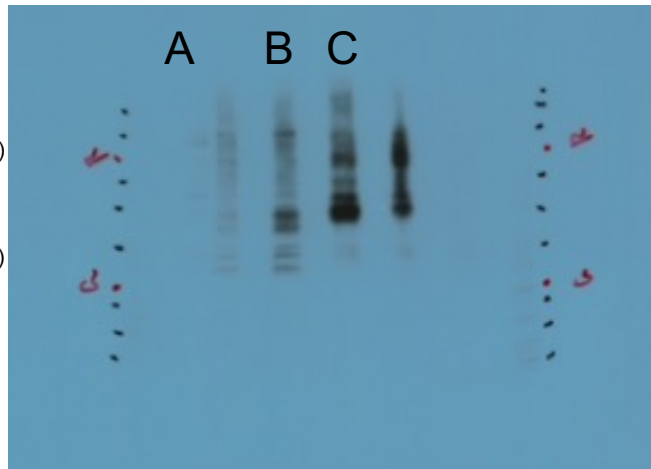

anti-SOX17  
(Exposure:10 min)

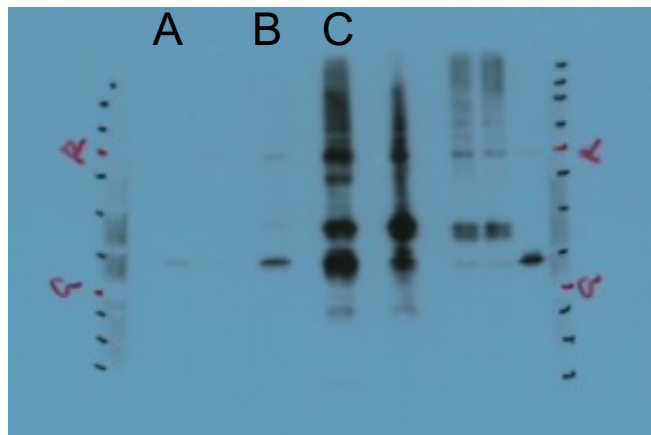

anti-DMRT1  
(Exposure:3 sec)

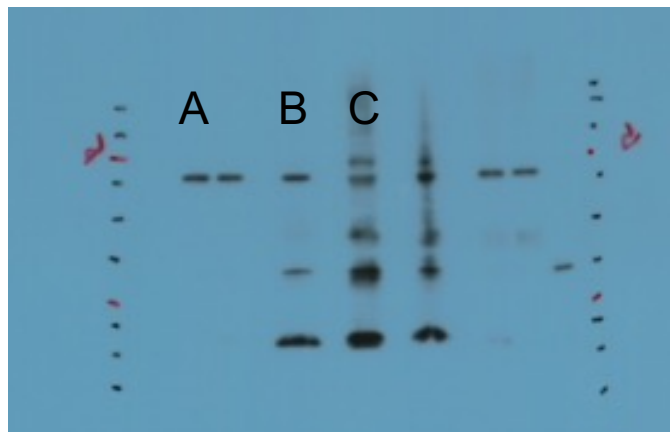

anti-LAMINB1  
(Exposure:10 sec)

# Source Data for Extended Data Figure 3E: Western blot

A: ESC  
B: day3+6 PGCLC  
C: SOX17+DMRT1 clone2

(kDa)  
245  
180  
135  
100  
75(R:Red)  
63  
48  
35  
25(Green)  
20  
17  
11

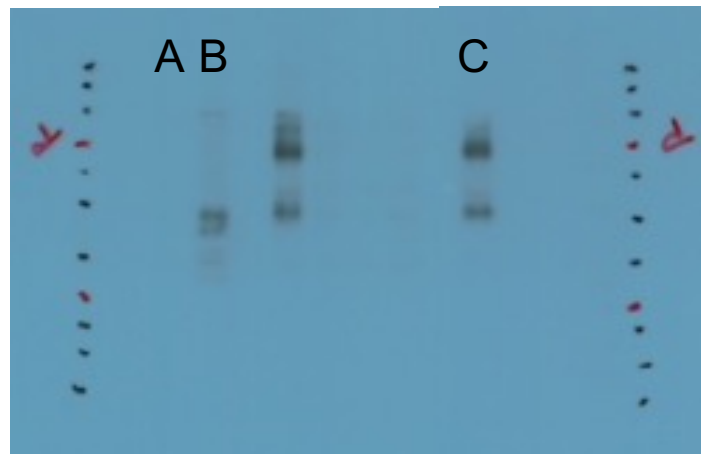

anti-SOX17  
(Exposure:15 sec)

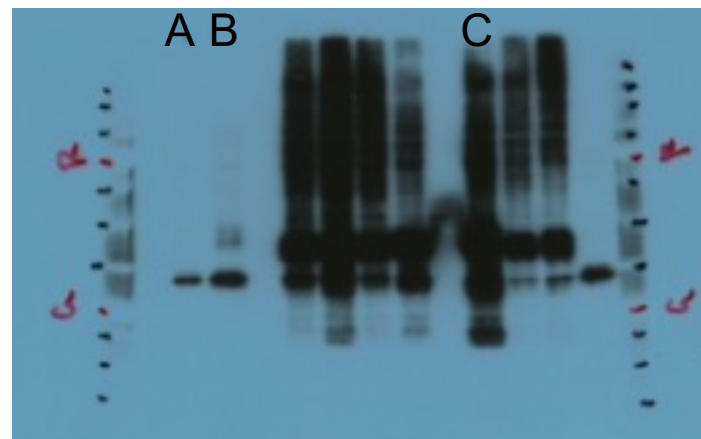

anti-DMRT1  
(Exposure:1 mins)

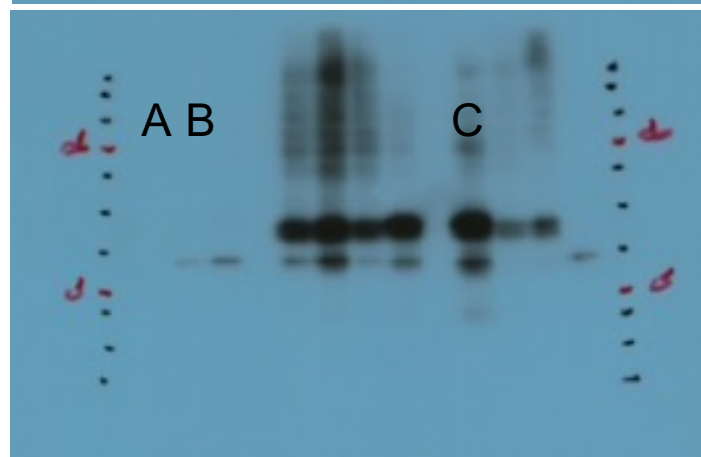

anti-DMRT1  
(Exposure:3 sec)

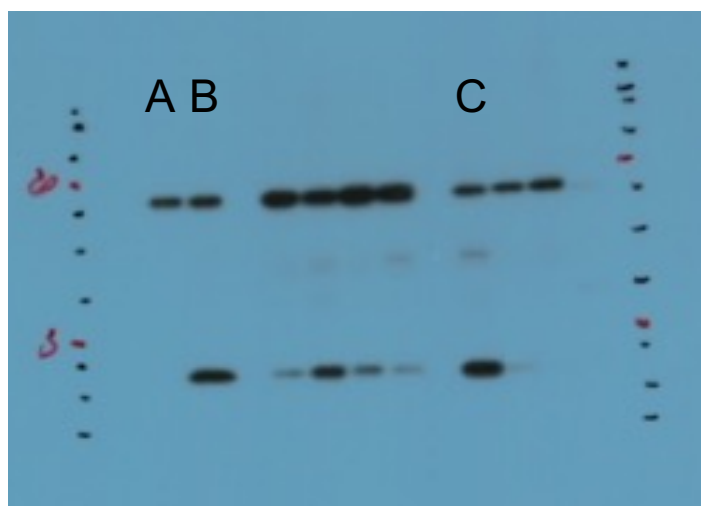

anti-LAMINB1  
(Exposure:1 min)
